# Supplementary material
Source: MDPI journal article supplement (https://www.mdpi.com/2813-4168/2/2/6)
Supplement: s1 [file s1]

**Table S1:** Data CO<sub>2</sub> eq., Population, Population Density, GDP, Territorial area Residential area, GFA, Settlements area, Road lines, Arable land, Vegetated land data of municipalities in Pavia Province.

| Municipality               | CO <sub>2</sub> eq.<br>[kt/year] | Population<br>[inhabit-<br>ants] | Population<br>Density<br>[in-<br>hab./kmq] | GDP [€]      | Territo-<br>rial area<br>[sqkmq] | Residen-<br>tial area<br>[sqm] | GFA [mq] | Settle-<br>ments area<br>[sqm] | Road lines<br>[m] | Arable<br>land [sqm] | Vegetated<br>land<br>[sqm] |
|----------------------------|----------------------------------|----------------------------------|--------------------------------------------|--------------|----------------------------------|--------------------------------|----------|--------------------------------|-------------------|----------------------|----------------------------|
| Ferrera<br>Erbognone       | 2869,71798                       | 1171                             | 59,9                                       | 15442841     | 19,17                            | 517337                         | 667532   | 2438116                        | 43778             | 14728155             | 1295014                    |
| Sannazzaro<br>de' Burgondi | 2245,46                          | 5533                             | 237,3                                      | 77957469     | 23,33                            | 1385716                        | 1429065  | 2120149                        | 78233             | 16561204             | 1886223                    |
| Voghera                    | 886,21591                        | 39356                            | 621,9                                      | 637341042    | 63,44                            | 7261991                        | 6785758  | 3556511                        | 274498            | 48037718             | 2467872                    |
| Pavia                      | 350,57858                        | 71297                            | 1134,2                                     | 1502659302   | 63,25                            | 8983402                        | 10776269 | 4734546                        | 346757            | 38550845             | 7294540                    |
| Vigevano                   | 287,34733                        | 63268                            | 768                                        | 970129252    | 81,36                            | 10876712                       | 8962370  | 4413324                        | 434552            | 43620466             | 18250505                   |
| Parona                     | 240,80693                        | 1975                             | 211,5                                      | 26400225     | 9,3                              | 558399                         | 1152774  | 1170139                        | 34797             | 6578577              | 758298                     |
| Mortara                    | 126,61692                        | 15543                            | 298,2                                      | 228606170    | 51,97                            | 3165322                        | 3697860  | 3384162                        | 186578            | 41917869             | 3007896                    |
| Casei Gerola               | 117,74213                        | 2545                             | 102,6                                      | 37569662     | 24,81                            | 916969                         | 1122272  | 1542184                        | 88052             | 19420767             | 1198576                    |
| Gambolo'                   | 114,33894                        | 10149                            | 197                                        | 142747491    | 51,7                             | 2803374                        | 2269750  | 1263316                        | 142886            | 40428995             | 6513574                    |
| Landriano                  | 96,17717                         | 6271                             | 405,1                                      | 96466265     | 15,59                            | 1075303                        | 1648171  | 1230690                        | 58591             | 11732894             | 1182031                    |
| Casteggio                  | 78,88891                         | 6918                             | 389,1                                      | 105760795    | 17,66                            | 2317959                        | 1861695  | 932752                         | 101448            | 12361186             | 1971616                    |
| Garlasco                   | 77,32348                         | 9872                             | 252,9                                      | 145317440    | 39,18                            | 2911346                        | 1960517  | 1242558                        | 95344             | 30441743             | 3908552                    |
| Robbio<br>Lomellina        | 75,87762                         | 6095                             | 151,1                                      | 90887926     | 40,54                            | 1862577                        | 1527491  | 1055204                        | 86825             | 36275794             | 829853                     |
| Corteolona e<br>Genzone    | 68,5868                          | 2628                             | 186,52                                     | 37870210     | 14,09                            | 788437                         | 1445369  | 927830                         | 29782             | 11213551             | 537554                     |
| Gropello<br>Cairolì        | 67,59821                         | 4674                             | 179                                        | 70137526     | 26,22                            | 1533225                        | 1039494  | 665193                         | 112441            | 19902903             | 3337806                    |
| Mezzana<br>Bigli           | 61,68906                         | 1128                             | 60,1                                       | 15514343     | 19,02                            | 684895                         | 449965   | 495776                         | 60301             | 13217177             | 1561315                    |
| Stradella                  | 57,42212                         | 11638                            | 620                                        | 190082829    | 18,84                            | 3100085                        | 3538208  | 1326047                        | 107983            | 11465388             | 2246386                    |
| Broni                      | 55,82054                         | 9417                             | 451,2                                      | 138298601    | 20,85                            | 2311490                        | 2310012  | 1527051                        | 101392            | 14525675             | 1901676                    |
| Giussago                   | 54,34887                         | 5146                             | 207,8                                      | 83116357     | 24,72                            | 1478295                        | 754161   | 482734                         | 57712             | 21070688             | 1074346                    |
| Mede                       | 54,01129                         | 6832                             | 205,8                                      | 92461725     | 32,89                            | 1917165                        | 1076200  | 491848                         | 75220             | 29225708             | 1238381                    |
| Dorno                      | 51,6871                          | 4675                             | 152,7                                      | 67031167     | 30,57                            | 1651127                        | 1269087  | 704580                         | 84713             | 25535300             | 2105547                    |
| Tromello                   | 51,3545                          | 3870                             | 110                                        | 52833433     | 35,5                             | 1248998                        | 701091   | 608182                         | 62505             | 30465078             | 2223566                    |
| Zerbolò'                   | 44,32901                         | 1719                             | 45,5                                       | 26608164     | 37,19                            | 939057                         | 365927   | 174725                         | 41410             | 29205365             | 5679854                    |
| Valle<br>Lomellina         | 41,84721                         | 2155                             | 79,5                                       | 26499897     | 27,24                            | 1063813                        | 640469   | 351123                         | 53890             | 24857451             | 570227                     |
| Cassolnovo                 | 41,28463                         | 7091                             | 221,9                                      | 103756882    | 31,74                            | 1818426                        | 1268011  | 830125                         | 54174             | 22501459             | 5596998                    |
| Arena Po                   | 40,95022                         | 1632                             | 73,3                                       | 23608058     | 22,49                            | 1075371                        | 1040649  | 1128599                        | 66661             | 16194370             | 2126498                    |
| Siziano                    | 39,4121                          | 5917                             | 501                                        | 101587299    | 11,79                            | 973783                         | 1451118  | 1205821                        | 46760             | 8762287              | 649970                     |
| Vidigulfo                  | 38,15237                         | 6223                             | 393,4                                      | 102970119    | 16,14                            | 1115849                        | 748988   | 538063                         | 39977             | 12733614             | 1286300                    |
| San Martino<br>Siccomario  | 38,05                            | 6036                             | 421,8                                      | 111180896,00 | 14,29                            | 1177543                        | 1127757  | 924929                         | 54356             | 10640905             | 1051713                    |

|                             |          |      |       |             |       |           |         |        |       |          |         |
|-----------------------------|----------|------|-------|-------------|-------|-----------|---------|--------|-------|----------|---------|
| Rivanazzano                 | 35,0805  | 5236 | 180,3 | 89542278    | 28,92 | 2341705   | 1203857 | 532631 | 98157 | 18549580 | 7070474 |
| Torre d'Isola               | 33,83865 | 2406 | 147,2 | 62149879    | 4,01  | 852999    | 484553  | 447692 | 55753 | 11497971 | 2396787 |
| Casorate<br>Primo           | 33,56829 | 8533 | 899,2 | 127815995   | 9,74  | 1444048   | 1109556 | 591184 | 44432 | 7060885  | 283102  |
| Cilavegna                   | 31,87248 | 5658 | 315   | 81276691    | 18,05 | 1308198   | 955970  | 618748 | 45747 | 14987104 | 840870  |
| Zeme                        | 31,83609 | 1092 | 43,7  | 13513176    | 24,58 | 650104    | 359567  | 140018 | 31705 | 22290232 | 1433531 |
| Belgioioso                  | 31,82007 | 6218 | 255,5 | 92282164    | 24,69 | 1375404   | 935130  | 738119 | 39396 | 20679328 | 1887112 |
| Casatisma                   | 31,57445 | 899  | 164,7 | 12910926    | 5,48  | 385395    | 346931  | 244411 | 18765 | 3721926  | 701576  |
| Zinasco                     | 30,68402 | 3297 | 111,7 | 46895946    | 29,74 | 1410910   | 751585  | 422552 | 92430 | 24087471 | 2227408 |
| Sartirana<br>Lomellina      | 30,50394 | 1716 | 58,1  | 22705522    | 29,54 | 899553    | 500053  | 232148 | 55583 | 26388142 | 1135759 |
| Olevano di<br>Lomellina     | 30,04256 | 748  | 48,5  | 8938385     | 15,38 | 383775    | 199868  | 148118 | 23098 | 14193533 | 399914  |
| Lomello                     | 29,56224 | 2240 | 100,7 | 28873305    | 22,36 | 925052    | 771617  | 555063 | 68596 | 19462730 | 801067  |
| Albuzzano                   | 29,40293 | 3547 | 232,4 | 52067408    | 15,45 | 1017396   | 495565  | 328107 | 32737 | 13863127 | 203992  |
| Villanterio                 | 29,22142 | 3289 | 226,4 | 47274778    | 14,77 | 135685612 | 880381  | 733735 | 48623 | 11932452 | 835181  |
| San Giorgio<br>di Lomellina | 29,09    | 1123 | 43,4  | 14136982,00 | 25,45 | 575984    | 387919  | 238731 | 62501 | 23327477 | 1586062 |
| Candia<br>Lomellina         | 28,61412 | 1598 | 57,5  | 19307104    | 27,9  | 741159    | 483510  | 224904 | 66544 | 24038176 | 1667710 |
| Chignolo Po                 | 28,30618 | 4087 | 176,8 | 53668867    | 23,39 | 1529194   | 1189813 | 949316 | 56230 | 18559639 | 1819873 |
| Confienza                   | 27,91377 | 1657 | 62    | 22089328    | 26,81 | 883952    | 514354  | 348472 | 37859 | 13511694 | 641521  |
| Pieve del<br>Cairo          | 27,35445 | 2114 | 82,9  | 26312799    | 25,11 | 943333    | 563084  | 432618 | 56412 | 20218123 | 2701146 |
| Pieve<br>Albignola          | 27,23379 | 888  | 50,3  | 11878426    | 18,15 | 385930    | 240782  | 182897 | 49553 | 13829514 | 1744933 |
| Carbonara al<br>Ticino      | 26,61139 | 1561 | 106,6 | 23279484    | 14,78 | 561555    | 304063  | 371778 | 25162 | 11707865 | 1628257 |
| Bascape'                    | 26,44072 | 1643 | 125,3 | 25187166    | 13,34 | 684902    | 506757  | 364357 | 33422 | 11817752 | 224285  |
| Castelnovetto               | 25,97863 | 607  | 32,8  | 7437899     | 18,21 | 432111    | 295730  | 257545 | 35889 | 17430720 | 304951  |
| Cava Manara                 | 25,84499 | 6732 | 386,2 | 112855444   | 17,26 | 1748650   | 854364  | 452271 | 50277 | 12203620 | 1633083 |
| Cura<br>Carpignano          | 25,2124  | 4748 | 444,6 | 78088034    | 11,09 | 915680    | 697564  | 615079 | 40187 | 8903984  | 324060  |
| Rognano                     | 24,82696 | 647  | 70,2  | 11651426    | 9,36  | 176288    | 80087   | 55140  | 23289 | 8283114  | 343281  |
| Torrevecchia<br>Pia         | 24,78784 | 3512 | 215,5 | 49047432    | 16,5  | 953309    | 614314  | 296187 | 42452 | 14531710 | 450539  |
| Certosa di<br>Pavia         | 24,18909 | 5234 | 488,7 | 86827006    | 10,86 | 1087917   | 620085  | 333176 | 46856 | 8829697  | 345950  |
| Linarolo                    | 23,57541 | 2815 | 229,8 | 41842690    | 13,17 | 709015    | 454541  | 252955 | 32796 | 8570096  | 1453384 |
| Gravellona<br>Lomellina     | 23,44909 | 2790 | 136,6 | 40840978    | 20,34 | 866509    | 670381  | 277447 | 77364 | 18063191 | 913704  |
| Borgo San<br>Siro           | 22,86398 | 1054 | 60,8  | 14008387    | 17,64 | 508427    | 253624  | 205649 | 31119 | 12390929 | 4504248 |

|                                  |          |      |       |             |       |         |         |        |        |          |          |
|----------------------------------|----------|------|-------|-------------|-------|---------|---------|--------|--------|----------|----------|
| Santa<br>Cristina e<br>Bissone   | 22,86    | 2031 | 91,5  | 30845024,00 | 22,42 | 882378  | 943117  | 775327 | 46343  | 19606916 | 659084   |
| Bereguardo                       | 22,2682  | 2721 | 154,2 | 51736578    | 17,86 | 920007  | 517948  | 279069 | 54130  | 9192419  | 5841085  |
| Bornasco                         | 22,04555 | 2641 | 208,6 | 40382551    | 12,93 | 685091  | 351876  | 382761 | 25398  | 11339654 | 523783   |
| Pieve Porto<br>Morone            | 21,54103 | 2740 | 167,8 | 36581043    | 16,4  | 1094546 | 797672  | 509908 | 45489  | 12974554 | 1064250  |
| Santa Maria<br>della Versa       | 20,78605 | 2476 | 132,7 | 32913393    | 18,47 | 1310420 | 801187  | 350550 | 110790 | 15475927 | 1524337  |
| Palestro                         | 20,78137 | 1987 | 106,1 | 26576050    | 18,81 | 852716  | 480668  | 206876 | 30860  | 15576876 | 1021741  |
| San Genesio<br>ed Uniti          | 19,96    | 3847 | 427,9 | 77846790    | 9,27  | 1043565 | 508867  | 321827 | 34424  | 7094690  | 574294   |
| Frascarolo                       | 19,76965 | 1201 | 51,3  | 15170603    | 24,18 | 677349  | 438636  | 226851 | 79586  | 20118767 | 1864922  |
| Ottobiano                        | 19,75222 | 1119 | 45,6  | 14709158    | 24,98 | 600150  | 544601  | 419619 | 54044  | 21223853 | 1813590  |
| Vellezzo<br>Bellini              | 19,73835 | 3174 | 402,3 | 50995534    | 8,2   | 783943  | 500309  | 628254 | 25229  | 5950502  | 356544   |
| Costa de'<br>Nobili              | 19,48641 | 365  | 31,6  | 4793754     | 11,82 | 269101  | 212242  | 287318 | 25001  | 10353018 | 456794   |
| Cigognola                        | 19,44748 | 1370 | 170,4 | 18936143    | 7,88  | 732326  | 578058  | 345597 | 26597  | 5724566  | 1135557  |
| Rosasco                          | 19,43    | 616  | 31,1  | 7957632,00  | 19,55 | 469946  | 248431  | 99525  | 23702  | 17941343 | 697820   |
| Montebello<br>della<br>Battaglia | 18,43784 | 1669 | 105,4 | 24201300    | 15,74 | 962909  | 646131  | 615993 | 62413  | 13127432 | 669790   |
| Godiasco e<br>Salice Terme       | 18,43339 | 3224 | 156,4 | 62016330    | 20,61 | 1652012 | 727770  | 192053 | 101245 | 7355673  | 10935161 |
| Menconico                        | 18,34118 | 367  | 13    | 5559063     | 28,14 | 565236  | 216248  | 80029  | 114731 | 7925231  | 19754999 |
| Castello<br>d'agogna             | 17,76714 | 1149 | 108,2 | 16306489    | 10,74 | 462889  | 378250  | 296490 | 24985  | 9248664  | 388078   |
| Silvano Pietra                   | 17,24091 | 678  | 49    | 8813682     | 13,67 | 365966  | 252977  | 168209 | 30808  | 12195449 | 427398   |
| Langosco                         | 17,12882 | 425  | 27    | 4591508     | 15,82 | 382241  | 195101  | 69251  | 35400  | 14007646 | 707592   |
| Cozzo                            | 16,90734 | 349  | 20,1  | 4234731     | 17,61 | 355751  | 156994  | 37304  | 21728  | 15766461 | 778715   |
| Pinarolo Po                      | 16,40905 | 1730 | 155,2 | 24590540    | 11,31 | 725247  | 551152  | 348926 | 21657  | 9149623  | 680392   |
| Castelletto di<br>Branduzzo      | 16,21128 | 1033 | 90,2  | 15206019    | 11,77 | 633815  | 440537  | 364965 | 31834  | 9015078  | 696666   |
| Marzano                          | 16,1264  | 1657 | 179,7 | 20978289    | 9,29  | 456230  | 502501  | 370197 | 19593  | 7798237  | 551777   |
| Torre Beretti<br>e Castellaro    | 16,05999 | 583  | 33,2  | 5800764     | 17,66 | 391475  | 192739  | 110187 | 64703  | 15288249 | 1441135  |
| Filighera                        | 15,99745 | 856  | 105   | 11317674    | 8,25  | 304373  | 222986  | 238786 | 17009  | 7468349  | 181476   |
| Marcignago                       | 15,66061 | 2471 | 243,9 | 38270811    | 10,12 | 514955  | 397634  | 310542 | 33893  | 9255290  | 86456    |
| Lungavilla                       | 15,38686 | 2477 | 360   | 38954142    | 6,82  | 746435  | 430680  | 286550 | 25750  | 5089220  | 495550   |
| Miradolo<br>Terme                | 15,34758 | 3835 | 398,6 | 56518225    | 9,56  | 1361756 | 900949  | 334150 | 39225  | 6141904  | 1698705  |
| Bressana                         | 15,27386 | 3550 | 272   | 52463933    | 12,69 | 1197960 | 1003305 | 810090 | 39546  | 9268581  | 1179824  |

|                                    |          |      |                 |            |       |         |        |        |        |          |          |
|------------------------------------|----------|------|-----------------|------------|-------|---------|--------|--------|--------|----------|----------|
| Bottarone                          |          |      |                 |            |       |         |        |        |        |          |          |
| Breme                              | 15,25851 | 814  | 42,5            | 9135827    | 18,81 | 505178  | 281866 | 92088  | 40881  | 17138787 | 1077110  |
| Santa<br>Giuletta                  | 15,22    | 1664 | 142,6           | 22905789   | 11,59 | 826820  | 551187 | 192368 | 37647  | 8993449  | 1452330  |
| Battuda                            | 14,79681 | 675  | 96,6            | 9794353    | 7,14  | 304238  | 100547 | 27714  | 18323  | 6306845  | 294637   |
| Sant'angelo<br>Lomellina           | 14,66    | 832  | 79,8            | 9953921,00 | 10,5  | 426833  | 185761 | 169844 | 21997  | 9431336  | 306599   |
| Scaldasole                         | 14,60818 | 970  | 83,7            | 12835107   | 11,57 | 482645  | 249935 | 116604 | 26925  | 10446788 | 598334   |
| Travaco'<br>Siccomario             | 14,12655 | 4471 | 296,7           | 88634113   | 17,04 | 1311367 | 546027 | 150771 | 46281  | 11935407 | 1820015  |
| Colli Verdi                        | 14,10708 | 1170 | 28,4394749<br>6 | 14273729   | 41,14 | 1259740 | 532664 | 256125 | 172840 | 21529860 | 17234011 |
| Corana                             | 13,91055 | 811  | 62,2            | 11269134   | 12,87 | 551118  | 310721 | 265005 | 27190  | 9820771  | 1015677  |
| Trivulzio                          | 13,85235 | 2128 | 549,9           | 39278310   | 3,83  | 567331  | 379956 | 244708 | 23423  | 2741976  | 161785   |
| Sommo                              | 13,48099 | 1135 | 79,6            | 19192262   | 14,87 | 548444  | 262477 | 91641  | 40640  | 12010441 | 984376   |
| Valle<br>Salimbene                 | 12,72777 | 1534 | 216,7           | 30787510   | 7,16  | 458640  | 298408 | 219612 | 19803  | 6044131  | 297729   |
| Verrua Po                          | 12,64977 | 1305 | 115,9           | 18993109   | 11,44 | 830412  | 394825 | 156786 | 29511  | 9309495  | 513422   |
| Borgarello                         | 12,63843 | 2741 | 567,5           | 54142642   | 4,84  | 588628  | 236956 | 89723  | 27772  | 3838677  | 233879   |
| Trovo                              | 12,29293 | 1040 | 130,7           | 14472339   | 8,15  | 356148  | 148069 | 145583 | 18067  | 7559305  | 70145    |
| Inverno e<br>Monteleone            | 12,24295 | 1439 | 149,7           | 23728170   | 9,64  | 681402  | 315273 | 153945 | 27262  | 8598335  | 390543   |
| Valeggio                           | 12,23002 | 241  | 24,6            | 2378940    | 9,85  | 276359  | 97028  | 51164  | 23226  | 9278683  | 149897   |
| Monticelli<br>Pavese               | 12,18316 | 700  | 34,7            | 8658740    | 20,19 | 531946  | 226886 | 177937 | 21274  | 15997342 | 1221846  |
| Cernago                            | 12,09257 | 743  | 54,6            | 10047291   | 13,56 | 388486  | 183450 | 50097  | 16160  | 12414495 | 565145   |
| Montu'<br>Beccaria                 | 11,84925 | 1730 | 110,9           | 26104353   | 15,49 | 1082940 | 543531 | 160183 | 87958  | 12279019 | 2057703  |
| Redavalle                          | 11,71614 | 1102 | 201,5           | 14691070   | 5,41  | 489549  | 284390 | 168576 | 29833  | 4486558  | 205455   |
| Mezzanino                          | 11,57624 | 1456 | 105             | 22916065   | 12,51 | 843768  | 371714 | 203798 | 35963  | 10273539 | 1277415  |
| Vistarino                          | 11,52934 | 1577 | 170,5           | 21363430   | 9,49  | 461341  | 246988 | 144486 | 23629  | 8527945  | 198154   |
| Santa<br>Margherita di<br>Staffora | 11,14    | 488  | 13,3            | 6502421,00 | 36,9  | 439545  | 263311 | 79182  | 164855 | 4760389  | 30728027 |
| Semiana                            | 10,8079  | 240  | 24,1            | 2897683    | 9,72  | 236870  | 102607 | 54547  | 13480  | 9490792  | 143083   |
| Barbianello                        | 10,7983  | 891  | 75,3            | 12951399   | 11,71 | 530618  | 268712 | 279940 | 21430  | 10796286 | 288944   |
| Robecco<br>Pavese                  | 10,58433 | 555  | 80,2            | 7788049    | 6,93  | 409045  | 174118 | 95445  | 24828  | 6204779  | 73987    |
| Borgo Priolo                       | 10,53329 | 1394 | 48,1            | 20025795   | 28,81 | 1074341 | 570378 | 333516 | 125713 | 15654608 | 11211153 |
| Brallo di<br>Pregola               | 10,47584 | 638  | 13,8            | 7451295    | 46,14 | 751422  | 397732 | 51429  | 169887 | 5769705  | 38544303 |
| Ceranova                           | 10,36391 | 2048 | 452,1           | 30969086   | 4,6   | 443140  | 184653 | 135347 | 9168   | 3856848  | 112182   |

|                          |          |      |       |          |       |         |         |        |        |          |          |
|--------------------------|----------|------|-------|----------|-------|---------|---------|--------|--------|----------|----------|
| Montalto Pavese          | 10,24762 | 918  | 48    | 10730715 | 19,07 | 895147  | 353750  | 87285  | 99272  | 14107198 | 3949279  |
| Codevilla                | 10,0926  | 1031 | 79,3  | 17114490 | 12,96 | 598527  | 537780  | 522229 | 57314  | 8984339  | 2799002  |
| Bosnasco                 | 9,95266  | 630  | 132,1 | 11668336 | 4,84  | 411468  | 296324  | 235457 | 22140  | 3626930  | 481080   |
| Galliavola               | 9,90219  | 209  | 24,5  | 2293750  | 9,23  | 206079  | 86548   | 83429  | 10123  | 7824861  | 291732   |
| Nicorvo                  | 9,81178  | 367  | 45    | 3358336  | 8,08  | 325421  | 140583  | 17952  | 11616  | 7318579  | 222895   |
| Sant'alessio con Vialone | 9,60     | 933  | 142,2 | 15590264 | 6,56  | 335816  | 186678  | 222239 | 11445  | 5504909  | 403203   |
| Villanova d'ardenghi     | 9,37697  | 778  | 114,2 | 13225451 | 6,61  | 289744  | 238478  | 302448 | 15645  | 5685396  | 415583   |
| Gerenzago                | 9,37084  | 1409 | 262,9 | 19151888 | 5,41  | 429118  | 252698  | 134782 | 12361  | 4731099  | 106413   |
| Magherno                 | 9,36989  | 1723 | 338,5 | 23647986 | 5,25  | 507088  | 296438  | 98404  | 15004  | 4325417  | 113342   |
| Varzi                    | 9,27863  | 3338 | 56,8  | 49629012 | 57,62 | 1805066 | 1126149 | 466969 | 230418 | 15940666 | 37878894 |
| Casanova Lonati          | 9,26637  | 474  | 103,5 | 6040396  | 4,63  | 259945  | 136080  | 86659  | 9760   | 4046491  | 157617   |
| Alagna                   | 9,20167  | 854  | 104,8 | 12041723 | 8,34  | 427980  | 176829  | 189780 | 11741  | 7551900  | 466241   |
| Romagnese                | 9,06259  | 692  | 23,2  | 9088139  | 29,72 | 873239  | 363777  | 62632  | 124452 | 8238018  | 20241426 |
| Zeccone                  | 8,95621  | 1736 | 317,9 | 27501566 | 5,53  | 451732  | 249531  | 207366 | 14850  | 4637512  | 218003   |
| Pietra de' Giorgi        | 8,77045  | 898  | 81,3  | 10540238 | 11,2  | 629186  | 291520  | 63967  | 58596  | 8417814  | 2009976  |
| Copiano                  | 8,6271   | 1736 | 401,9 | 27110468 | 4,34  | 424079  | 544904  | 394058 | 16571  | 3448513  | 106591   |
| Roncaro                  | 8,55953  | 1525 | 308,1 | 21959386 | 5,05  | 376320  | 155957  | 74556  | 17168  | 4350656  | 163670   |
| Ceretto Lomellina        | 8,55385  | 196  | 26,6  | 2173171  | 7,38  | 154056  | 73390   | 32753  | 12473  | 6671012  | 326402   |
| Retorbido                | 8,53717  | 1522 | 130,4 | 24736054 | 11,67 | 627568  | 430988  | 274832 | 60700  | 7935290  | 2615658  |
| San Cipriano Po          | 8,50     | 492  | 56,7  | 6095964  | 8,5   | 225076  | 355229  | 328032 | 13779  | 5001801  | 418855   |
| Rovescala                | 8,14     | 909  | 109,7 | 10729305 | 8,41  | 545116  | 323400  | 67004  | 58693  | 7061331  | 696916   |
| Velezzo Lomellina        | 8,07565  | 100  | 11,7  | 1090684  | 8,17  | 192299  | 77889   | 13020  | 10491  | 7892874  | 344972   |
| Torrazza Coste           | 7,98624  | 1714 | 106,4 | 26615309 | 16,23 | 1045026 | 491698  | 258081 | 71395  | 8844071  | 5977197  |
| Spessa                   | 7,84115  | 609  | 50    | 7488769  | 12,23 | 371321  | 205387  | 177793 | 16315  | 9158937  | 1063255  |
| Bastida Pancarana        | 7,72295  | 1046 | 78,3  | 14288463 | 12,5  | 401094  | 396146  | 210411 | 10912  | 10025110 | 1034825  |
| Lardirago                | 7,58844  | 1230 | 227,4 | 17080594 | 5,34  | 306135  | 176728  | 26486  | 12908  | 4865943  | 234927   |
| Gambarana                | 7,44041  | 232  | 19,3  | 2330144  | 11,78 | 249371  | 122989  | 41959  | 39429  | 9914905  | 995277   |
| Campospionoso            | 7,41044  | 1018 | 275,9 | 16187026 | 3,69  | 423925  | 294948  | 250351 | 10090  | 2700016  | 203650   |
| Ponte Nizza              | 7,34387  | 827  | 35,8  | 11137167 | 22,96 | 794519  | 345930  | 133332 | 117915 | 8372530  | 13354247 |
| Zavattarello             | 7,3123   | 1001 | 35,3  | 15026035 | 28,4  | 871139  | 404235  | 153924 | 109201 | 10386563 | 16397709 |
| Torre d'arese            | 6,92093  | 978  | 223,8 | 13053267 | 4,49  | 282894  | 138201  | 68791  | 7992   | 3887200  | 100829   |

|                      |         |      |        |            |       |        |        |        |        |         |          |
|----------------------|---------|------|--------|------------|-------|--------|--------|--------|--------|---------|----------|
| Corvino San Quirico  | 6,85071 | 1050 | 238,6  | 16049077   | 4,37  | 511364 | 236455 | 73333  | 34657  | 3231457 | 572365   |
| Canneto Pavese       | 6,80016 | 1382 | 237,9  | 19289486   | 5,81  | 696129 | 422697 | 178672 | 47227  | 3093460 | 1837487  |
| Bagnaria             | 6,65635 | 696  | 42     | 9244390    | 16,66 | 451393 | 230800 | 106884 | 75439  | 4475200 | 10679265 |
| Portalbera           | 6,48692 | 1516 | 323,9  | 21138141   | 4,48  | 510794 | 361852 | 161879 | 19324  | 3323788 | 420846   |
| Montecalvo Versiggia | 6,27143 | 554  | 49,6   | 8073419    | 11,4  | 544650 | 226358 | 58118  | 67916  | 8685085 | 1856527  |
| Fortunago            | 6,04613 | 399  | 22,2   | 5261940    | 17,82 | 557491 | 185915 | 34002  | 87449  | 8366230 | 8927240  |
| Pizzale              | 5,96659 | 722  | 99,4   | 11213091   | 7,09  | 417160 | 190225 | 125466 | 15777  | 6208949 | 235435   |
| Mornico Losana       | 5,87142 | 657  | 80,2   | 9778931    | 8,3   | 507100 | 220234 | 20367  | 39450  | 6300829 | 1353897  |
| Castana              | 5,85354 | 732  | 141,6  | 10996617   | 5,28  | 481879 | 207440 | 32542  | 35630  | 3433913 | 1223808  |
| Cervesina            | 5,62437 | 1242 | 99,4   | 17383703   | 12,41 | 580561 | 375252 | 350749 | 24860  | 8359516 | 1770297  |
| Torre de' Negri      | 5,55226 | 333  | 82,2   | 4149481    | 16,44 | 119330 | 121414 | 159936 | 14078  | 3342530 | 268675   |
| Albaredo Arnaboldi   | 5,34008 | 243  | 26,4   | 3474574    | 8,76  | 190003 | 147195 | 119439 | 21504  | 8219113 | 502253   |
| San Damiano al Colle | 5,23    | 699  | 108,5  | 8060438,00 | 6,43  | 400866 | 241368 | 46050  | 47154  | 5099967 | 870694   |
| Albonese             | 5,07943 | 565  | 131,7  | 8166998    | 4,33  | 253218 | 171864 | 172221 | 12308  | 3685516 | 139558   |
| Suardi               | 4,92839 | 632  | 64,4   | 8007919    | 9,85  | 388335 | 138201 | 48715  | 17853  | 7376223 | 1246056  |
| Cecima               | 4,79155 | 238  | 23,5   | 2878824    | 10,12 | 249989 | 114665 | 57112  | 61856  | 4929822 | 4658254  |
| Badia Pavese         | 4,6494  | 400  | 79,7   | 4432035    | 5,06  | 262478 | 145281 | 100065 | 7744   | 4526705 | 78113    |
| Rocca de' Giorgi     | 4,49625 | 84   | 7,9    | 633452     | 10,5  | 163661 | 70079  | 3263   | 54685  | 5891545 | 4550083  |
| Torricella Verzate   | 4,34443 | 819  | 230,7  | 12765935   | 3,63  | 499967 | 220473 | 118558 | 28309  | 2398438 | 515774   |
| Montescano           | 4,27503 | 400  | 166,7  | 6761930    | 2,4   | 266833 | 136643 | 70556  | 17682  | 1839384 | 202772   |
| San Zenone al Po     | 3,98    | 612  | 89,1   | 7665819    | 6,89  | 293235 | 113394 | 26607  | 9516   | 4867574 | 653338   |
| Rocca Susella        | 3,97389 | 253  | 19,6   | 2905362    | 12,76 | 359686 | 120657 | 62701  | 53982  | 5395506 | 7010319  |
| Mezzana Rabattone    | 3,88945 | 490  | 69,7   | 6552218    | 7,06  | 285569 | 101454 | 7534   | 11255  | 4755826 | 734956   |
| Oliva Gessi          | 3,81027 | 173  | 44,2   | 2368443    | 3,91  | 167192 | 71004  | 9565   | 17982  | 2998214 | 746493   |
| Borgoratto Mormorolo | 3,69558 | 420  | 26,2   | 4822572    | 16,1  | 417113 | 165465 | 30034  | 81646  | 8391273 | 6871221  |
| Montesegale          | 3,3651  | 295  | 19,9   | 5278645    | 14,97 | 414044 | 158287 | 31121  | 41881  | 7715172 | 6625722  |
| Cornale e Bastida    | 3,20703 | 870  | 222,25 | 13976590   | 3,82  | 370569 | 199616 | 81811  | 11050  | 2611121 | 641299   |
| Zerbo                | 3,15637 | 439  | 68,8   | 5117911    | 6,36  | 247248 | 131722 | 26167  | 12076  | 5031372 | 270771   |
| Villa Biscossi       | 3,00344 | 73   | 14,6   | 745525     | 4,88  | 90473  | 50914  | 32533  | 7143   | 4572809 | 294573   |
| Val di Nizza         | 2,78206 | 651  | 22     | 8883485    | 29,68 | 775692 | 313623 | 72381  | 113421 | 8486472 | 19914474 |

|            |         |     |       |         |      |        |        |        |       |         |         |
|------------|---------|-----|-------|---------|------|--------|--------|--------|-------|---------|---------|
| Pancarana  | 2,72518 | 315 | 51,1  | 4131112 | 6,1  | 240716 | 124333 | 119136 | 12715 | 5782337 | 362832  |
| Volpara    | 2,66916 | 137 | 35,2  | 1583231 | 3,77 | 154324 | 66931  | 15591  | 20896 | 2784079 | 921332  |
| Zenevredo  | 2,50932 | 473 | 88,6  | 7069392 | 5,4  | 331664 | 145446 | 84334  | 23177 | 4593336 | 337547  |
| Verretto   | 2,20464 | 402 | 147,3 | 4957052 | 2,71 | 194653 | 96498  | 128278 | 11439 | 2031408 | 327641  |
| Golferenzo | 2,06031 | 196 | 45,1  | 2804711 | 4,42 | 224208 | 91058  | 20452  | 27638 | 2992303 | 1118606 |
| Rea        | 1,56697 | 431 | 145,6 | 5745015 | 2,16 | 202116 | 163207 | 83606  | 12558 | 1313383 | 234622  |
| Lirio      | 1,45246 | 130 | 75,1  | 1324318 | 1,75 | 130811 | 59931  | 22973  | 11928 | 1347821 | 193722  |
| Calvignano | 0,99358 | 127 | 18,4  | 1206421 | 6,98 | 209447 | 74402  | 17173  | 27830 | 4600624 | 1962481 |
